# Supplementary material for: Syntheses, characterizations and properties of [Mo2O2S2]-based oxothiomolybdenum wheels incorporating bisphosphonate ligands
Source: Royal Society of Chemistry journal article supplement (doi:10.1039/c2dt30534h), 2012-01-01
Supplement: c2dt30534h.pdf [file c2dt30534h.pdf]

**Syntheses, characterizations and properties of  
[Mo<sub>2</sub>O<sub>2</sub>S<sub>2</sub>]-based oxothiomolybdenum wheels incorporating  
bisphosphonate ligands.**

Hani El Moll,<sup>a</sup> Justin Claude Kemmegne-Mbouguen,<sup>a,b</sup>  
Mohamed Haouas,<sup>\*a</sup> Francis Taulelle,<sup>a</sup> Jérôme Marrot,<sup>a</sup> Emmanuel  
Cadot, Pierre Mialane, Sébastien Floquet,<sup>\*a</sup> and Anne Dolbecq<sup>\*a</sup>

a) Institut Lavoisier de Versailles, UMR 8180, Université de  
Versailles Saint-Quentin en Yvelines, 45 avenue des  
Etats-Unis, 78035 Versailles, France. E-mails:  
[dolbecq@chimie.uvsq.fr](mailto:dolbecq@chimie.uvsq.fr), [sebastien.floquet@chimie.uvsq.fr](mailto:sebastien.floquet@chimie.uvsq.fr),  
[haouas@chimie.uvsq.fr](mailto:haouas@chimie.uvsq.fr) .

b) Laboratoire de Chimie Analytique, Faculté des Sciences,  
Université de Yaoundé I, B.P. 812, Yaoundé, Cameroon

**Supporting Information**

**Table SI1.** Comparison of selected bond distances in **Mo<sub>8</sub>S<sub>8</sub>(Ale)<sub>4</sub>**, **Mo<sub>8</sub>S<sub>8</sub>(Zol)<sub>4</sub>** and **Mo<sub>8</sub>O<sub>8</sub>(Ale)<sub>4</sub>**.

| <b>Mo<sub>8</sub>S<sub>8</sub>(Ale)<sub>4</sub></b> |             | <b>Mo<sub>8</sub>S<sub>8</sub>(Zol)<sub>4</sub></b> |             | <b>Mo<sub>8</sub>O<sub>8</sub>(Ale)<sub>4</sub></b> |            |               |           |
|-----------------------------------------------------|-------------|-----------------------------------------------------|-------------|-----------------------------------------------------|------------|---------------|-----------|
| Mo (1)-O (1)                                        | 1.6906 (11) | Mo (1)-O (1)                                        | 1.677 (3)   | Mo (1)-O (1)                                        | 1.681 (4)  | Mo (5)-O (25) | 1.704 (4) |
| Mo (1)-O (2)                                        | 2.0698 (11) | Mo (1)-O (2)                                        | 2.130 (4)   | Mo (1)-O (2)                                        | 1.932 (4)  | Mo (5)-O (9)  | 1.944 (4) |
| Mo (1)-O (3)                                        | 2.1058 (11) | Mo (1)-O (3)                                        | 2.200 (3)   | Mo (1)-O (3)                                        | 1.946 (4)  | Mo (5)-O (8)  | 1.948 (4) |
| Mo (1)-S (1)                                        | 2.3219 (4)  | Mo (1)-O (4)                                        | 2.204 (3)   | Mo (1)-O (4)                                        | 2.074 (4)  | Mo (5)-O (26) | 2.057 (4) |
| Mo (1)-S (2)                                        | 2.3226 (4)  | Mo (1)-S (2)                                        | 2.3263 (14) | Mo (1)-O (5)                                        | 2.079 (4)  | Mo (5)-O (27) | 2.110 (4) |
| Mo (1)-O (4)                                        | 2.3924 (10) | Mo (1)-S (1)                                        | 2.3295 (15) | Mo (1)-O (6)                                        | 2.408 (4)  | Mo (5)-O (28) | 2.287 (4) |
| Mo (1)-Mo (2)                                       | 2.8387 (2)  | Mo (1)-Mo (1)                                       | 2.8525 (8)  | Mo (1)-Mo (6)                                       | 2.5834 (7) |               |           |
|                                                     |             |                                                     |             |                                                     |            | Mo (6)-O (29) | 1.705 (5) |
| Mo (2)-O (5)                                        | 1.6832 (11) | Mo (2)-O (5)                                        | 1.679 (4)   | Mo (2)-O (7)                                        | 1.681 (4)  | Mo (6)-O (2)  | 1.934 (4) |
| Mo (2)-O (6)                                        | 2.1032 (10) | Mo (2)-O (7)                                        | 2.109 (3)   | Mo (2)-O (8)                                        | 1.938 (4)  | Mo (6)-O (3)  | 1.941 (4) |
| Mo (2)-O (7)                                        | 2.1074 (10) | Mo (2)-O (6)                                        | 2.111 (4)   | Mo (2)-O (9)                                        | 1.942 (4)  | Mo (6)-O (30) | 2.045 (4) |
| Mo (2)-S (1)                                        | 2.3243 (4)  | Mo (2)-S (3)                                        | 2.3078 (17) | Mo (2)-O (10)                                       | 2.072 (4)  | Mo (6)-O (31) | 2.116 (4) |
| Mo (2)-S (2)                                        | 2.3261 (4)  | Mo (2)-S (4)                                        | 2.3275 (16) | Mo (2)-O (11)                                       | 2.092 (4)  | Mo (6)-O (32) | 2.311 (4) |
| Mo (2)-O (8)                                        | 2.3965 (11) | Mo (2)-O (8)                                        | 2.402 (3)   | Mo (2)-O (12)                                       | 2.416 (4)  |               |           |
|                                                     |             | Mo (2)-Mo (2)                                       | 2.8583 (8)  | Mo (2)-Mo (5)                                       | 2.5968 (7) | Mo (7)-O (33) | 1.695 (4) |
|                                                     |             |                                                     |             |                                                     |            | Mo (7)-O (20) | 1.929 (4) |
|                                                     |             |                                                     |             | Mo (3)-O (13)                                       | 1.703 (4)  | Mo (7)-O (21) | 1.949 (4) |
|                                                     |             |                                                     |             | Mo (3)-O (15)                                       | 1.951 (4)  | Mo (7)-O (34) | 2.100 (4) |
|                                                     |             |                                                     |             | Mo (3)-O (14)                                       | 1.952 (4)  | Mo (7)-O (35) | 2.111 (4) |
|                                                     |             |                                                     |             | Mo (3)-O (16)                                       | 2.036 (4)  | Mo (7)-O (36) | 2.358 (4) |
|                                                     |             |                                                     |             | Mo (3)-O (17)                                       | 2.129 (4)  |               |           |
|                                                     |             |                                                     |             | Mo (3)-O (18)                                       | 2.310 (4)  | Mo (8)-O (37) | 1.692 (4) |
|                                                     |             |                                                     |             | Mo (3)-Mo (8)                                       | 2.5921 (7) | Mo (8)-O (14) | 1.942 (4) |
|                                                     |             |                                                     |             |                                                     |            | Mo (8)-O (15) | 1.950 (4) |
|                                                     |             |                                                     |             | Mo (4)-O (19)                                       | 1.702 (4)  | Mo (8)-O (38) | 2.071 (4) |
|                                                     |             |                                                     |             | Mo (4)-O (20)                                       | 1.937 (4)  | Mo (8)-O (39) | 2.076 (4) |
|                                                     |             |                                                     |             | Mo (4)-O (21)                                       | 1.951 (4)  | Mo (8)-O (40) | 2.413 (4) |
|                                                     |             |                                                     |             | Mo (4)-O (23)                                       | 2.056 (4)  |               |           |
|                                                     |             |                                                     |             | Mo (4)-O (22)                                       | 2.090 (4)  |               |           |
|                                                     |             |                                                     |             | Mo (4)-O (24)                                       | 2.357 (4)  |               |           |
|                                                     |             |                                                     |             | Mo (4)-Mo (7)                                       | 2.5758 (7) |               |           |

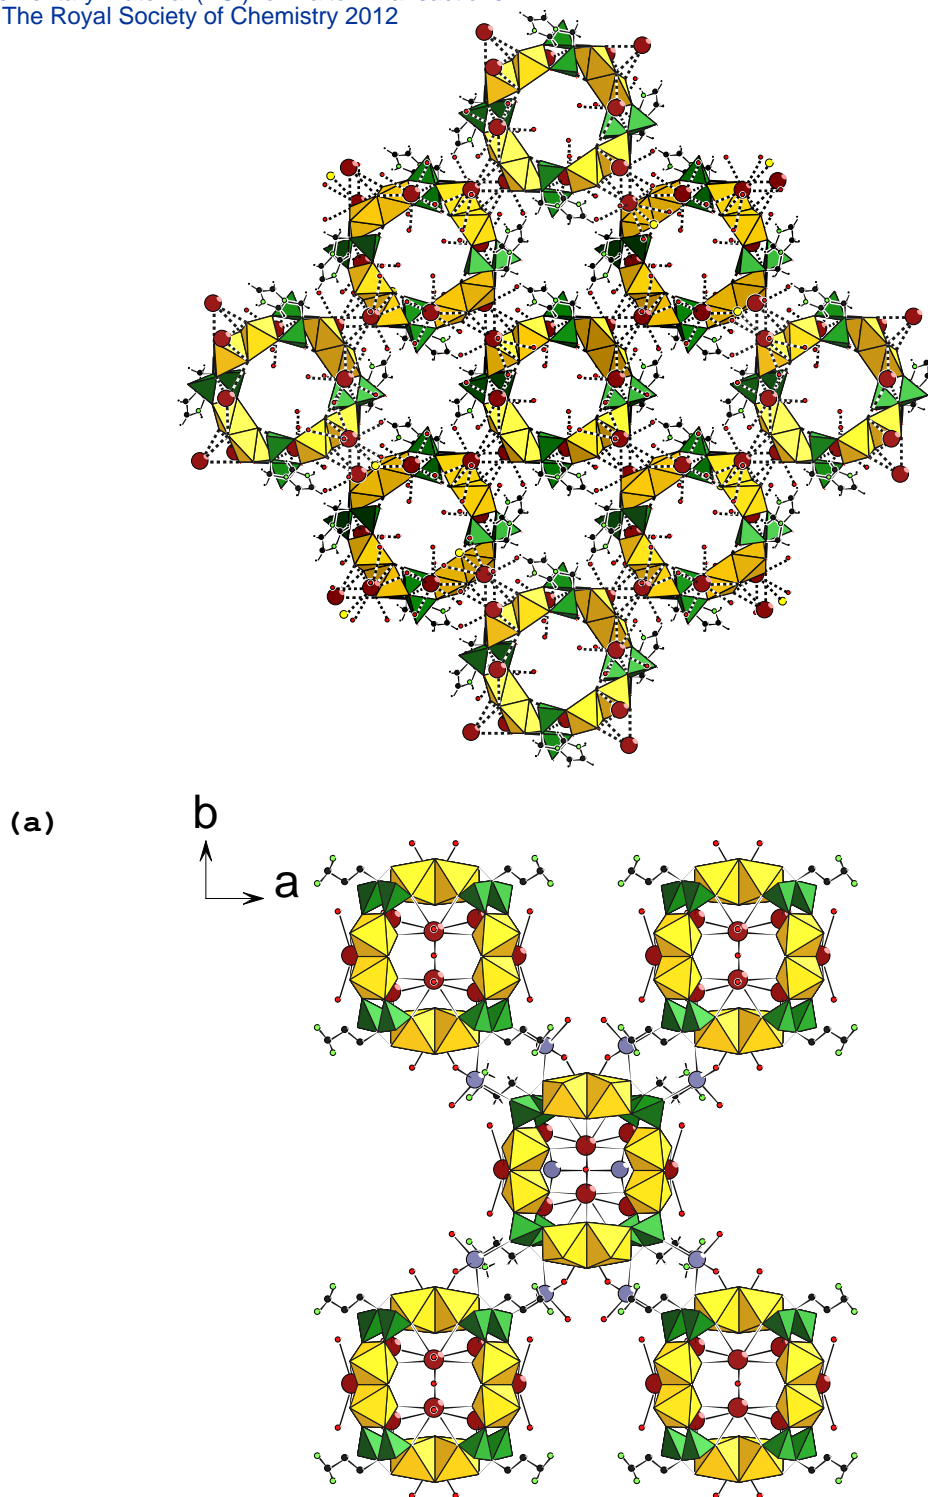

**Figure S11:** View along the *c* axis of the 3D structure of (a)  $\text{Rb}_8\text{Mo}_8\text{S}_8(\text{Zol})_{4.32}\text{H}_2\text{O}$  and (b)  $\text{Rb}_{4.75}\text{K}_{3.25}\text{Mo}_8\text{S}_8(\text{Ale})_{4.25}\text{H}_2\text{O}$ ; brown spheres = Rb, blue spheres = K, red spheres = O, green spheres = N, black spheres = C, yellow octahedra = MoO<sub>2</sub>S<sub>2</sub>, green tetrahedra = PCO<sub>3</sub>.

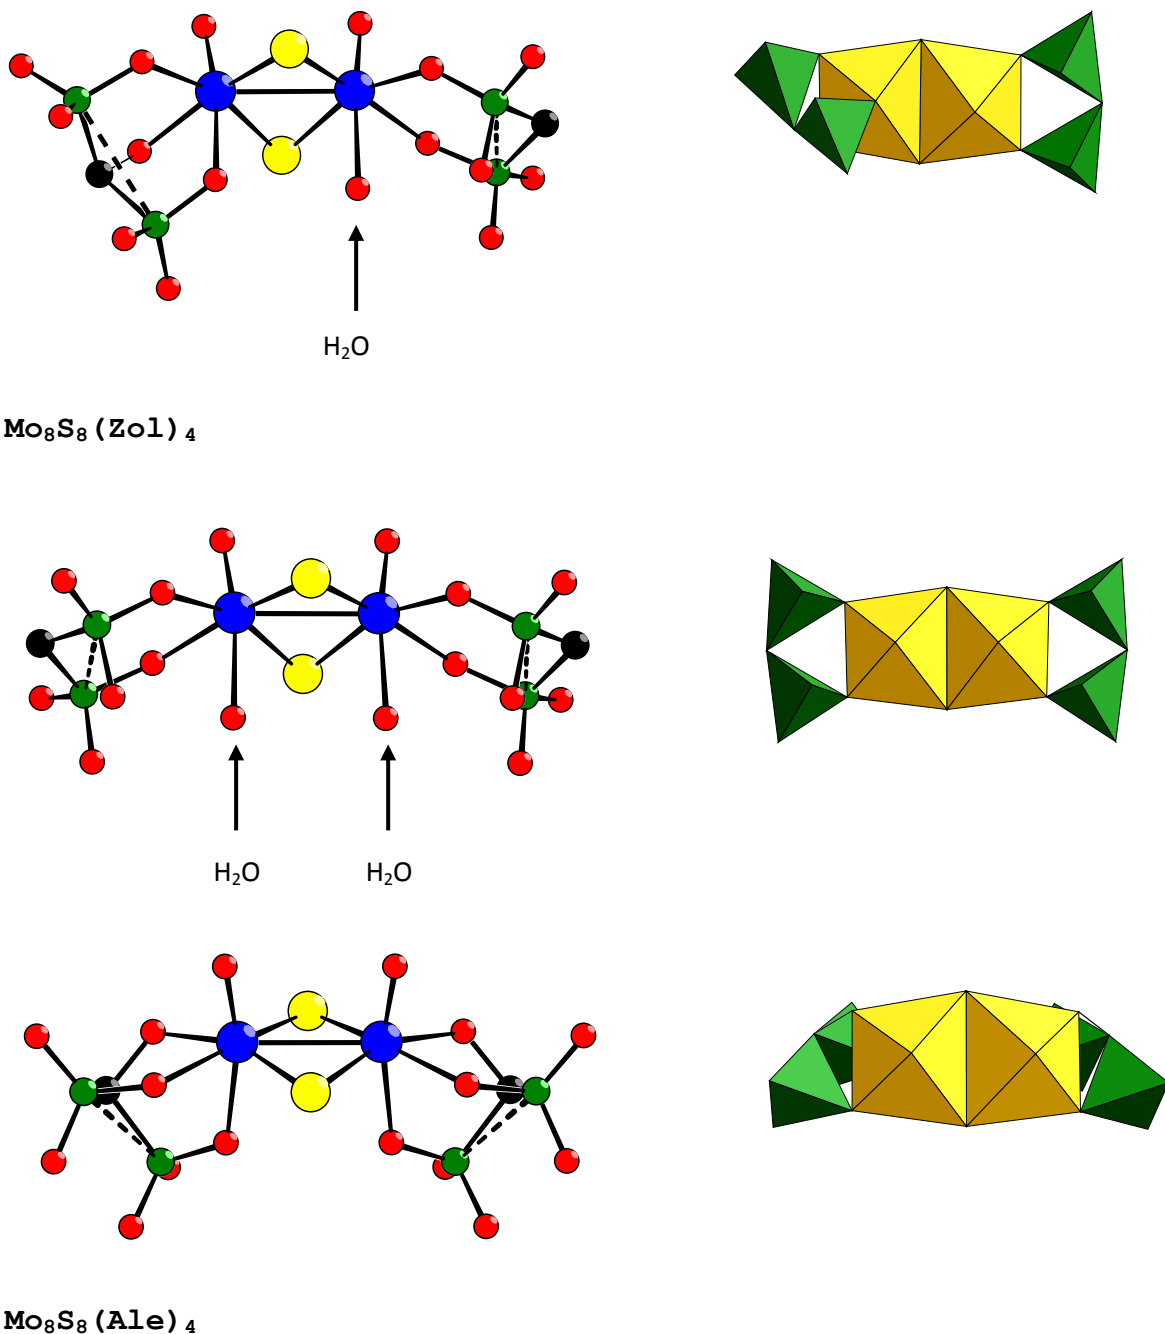

**Figure SI2:** View of (a) a  $\{\text{Mo}^{\text{V}}_2\text{S}_2\text{O}_2\}^{12+}$  dimer with BP ligands connected symmetrically in **Mo<sub>8</sub>S<sub>8</sub>(Zol)<sub>4</sub>** and (b) the two kinds of  $\text{Mo}^{\text{V}}$  dimers with BP ligands connected dissymmetrically in **Mo<sub>8</sub>S<sub>8</sub>(Ale)<sub>4</sub>**; red spheres = O, blue spheres = Mo, green spheres = P, black spheres = C, yellow octahedra =  $\text{MoO}_2\text{S}_2$ , green tetrahedra =  $\text{PCO}_3$ .

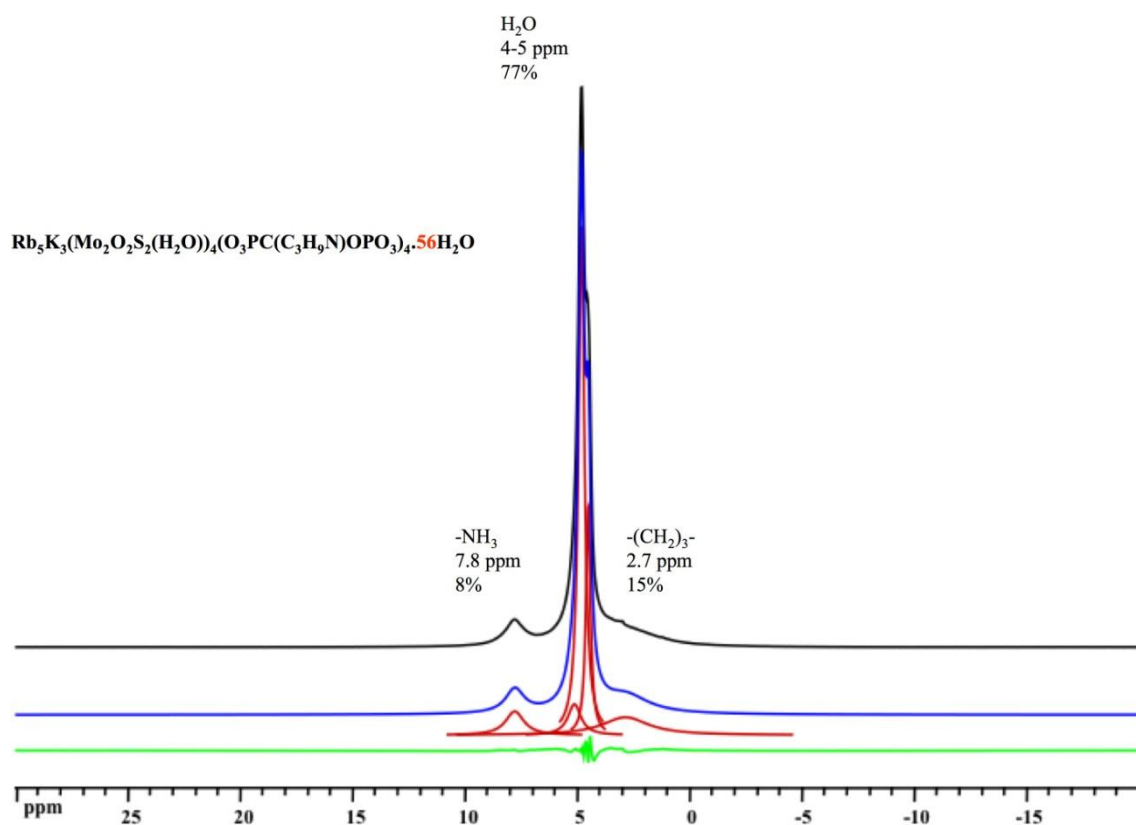

**Figure SI3:** Experimental  $^1\text{H}$  MAS NMR spectrum (black line) and simulated spectrum (blue line) with the decomposition (red lines) and difference spectrum (green line) of  **$\text{Mo}_8\text{S}_8(\text{Ale})_4$** .

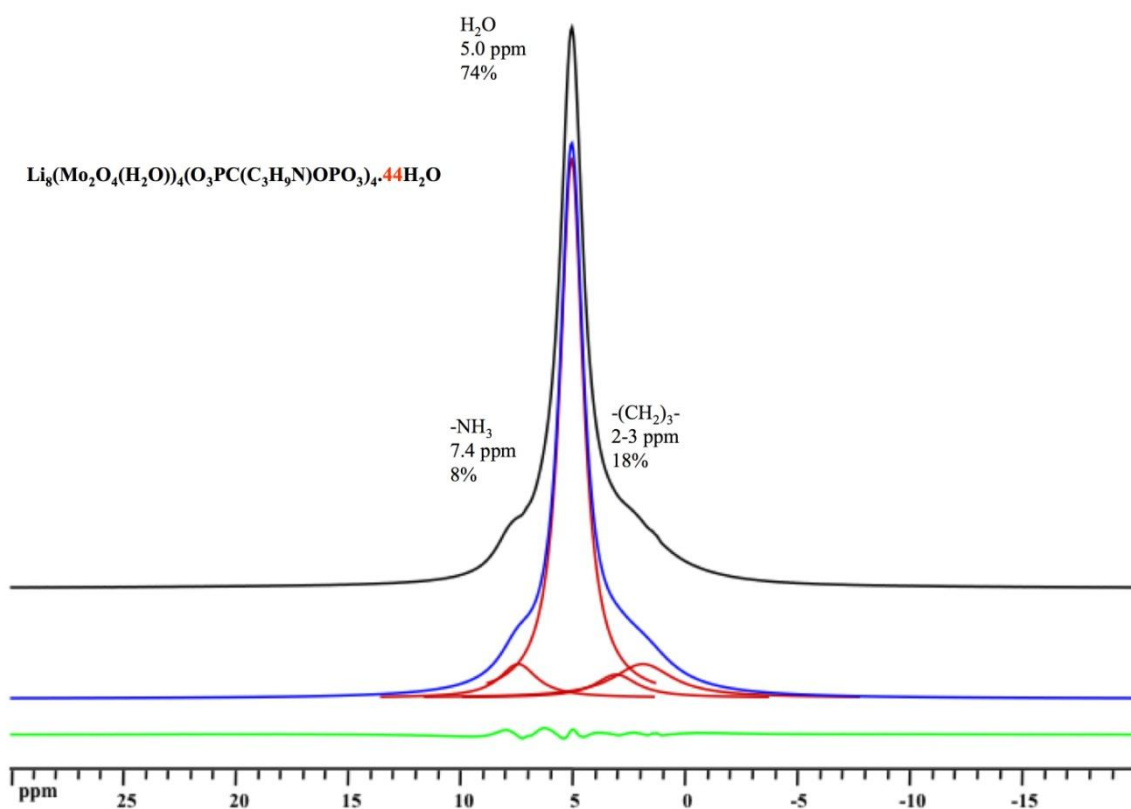

**Figure SI4:** Experimental  $^1\text{H}$  MAS NMR spectrum (black line) and simulated spectrum (blue line) with the decomposition (red lines) and difference spectrum (green line) of  **$\text{Mo}_8\text{O}_8(\text{Ale})_4$** .

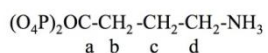

$^{13}\text{C}\{^1\text{H}\}$  CPMAS 10 kHz

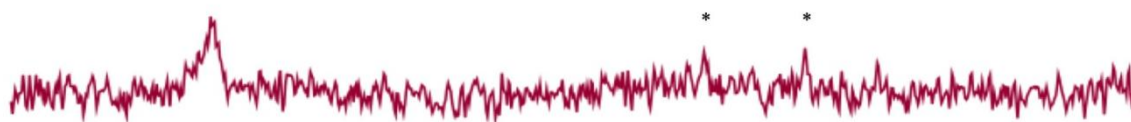

$^{13}\text{C}\{^1\text{H}\}$  HPDec MAS 10 kHz

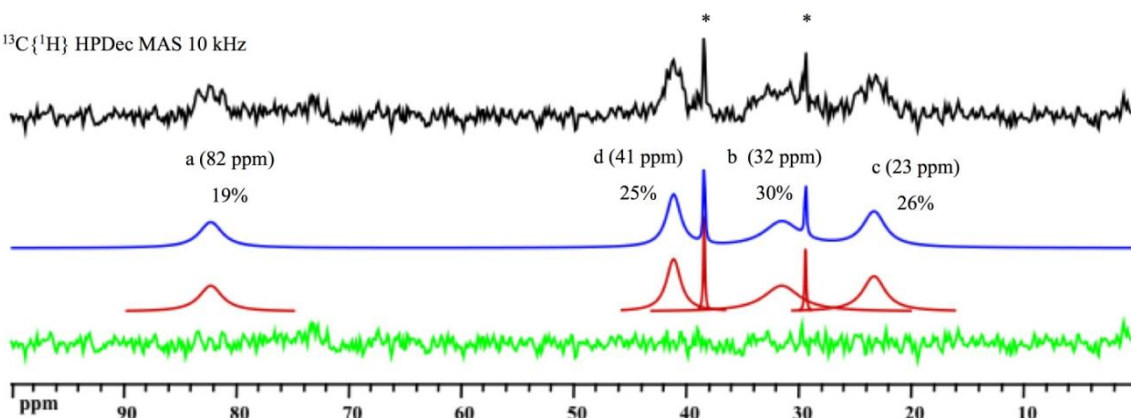

**Figure SI5:** Experimental  $^{13}\text{C}\{^1\text{H}\}$  CPMAS (top) and MAS (bottom black line) NMR spectra and simulated spectrum (blue line) with the decomposition (red lines) and difference spectrum (green line) of **Mo<sub>8</sub>S<sub>8</sub>(Ale)<sub>4</sub>** acquired under heteronuclear TPPM decoupling. Asterisks denote the signals of adamantane due to sample contamination in the NMR rotor.

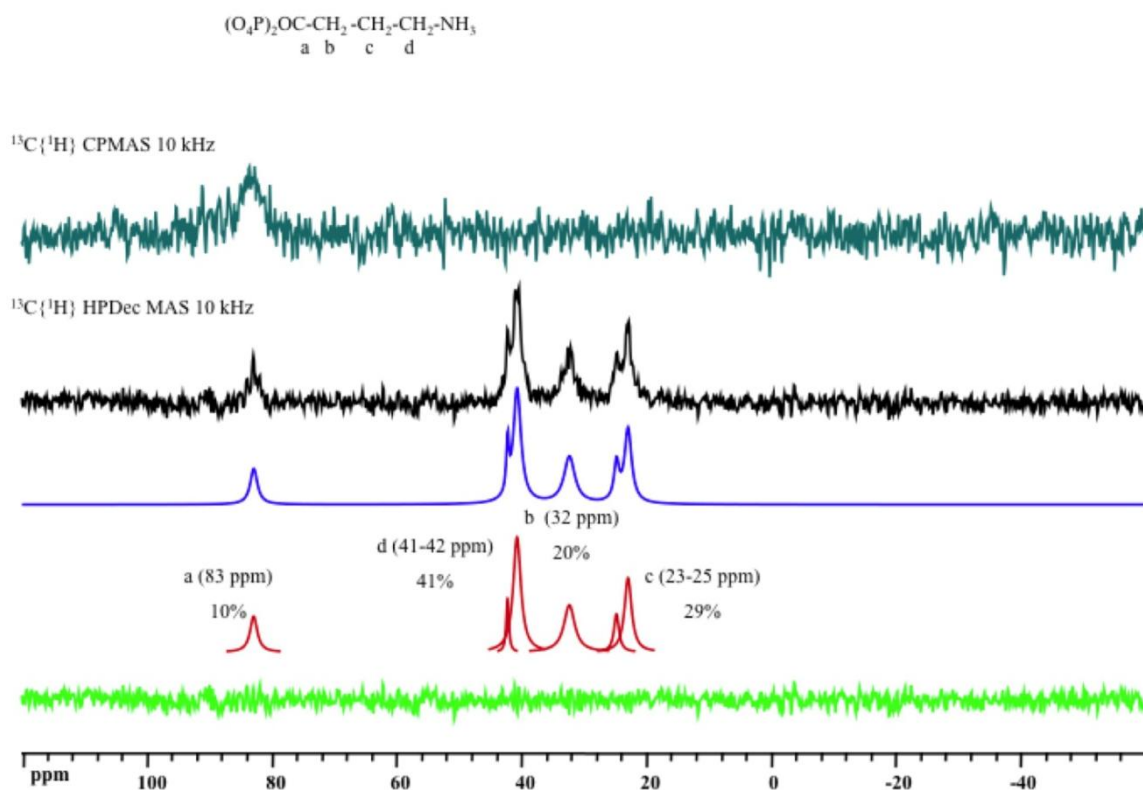

**Figure SI6:** Experimental  $^{13}\text{C}\{^1\text{H}\}$  CPMAS (top) and MAS (bottom, black line) NMR spectra and simulated spectrum (blue line) with the decomposition (red lines) and difference spectrum (green line) of **Mo<sub>8</sub>O<sub>8</sub>(Ale)<sub>4</sub>** acquired under heteronuclear TPPM decoupling.



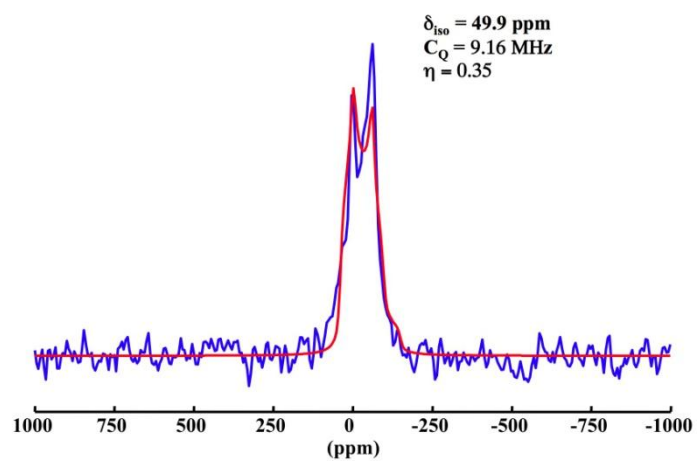

**Figure SI7:** Experimental  $^{87}\text{Rb}$  MAS NMR spectrum (blue line) and simulated spectrum (red line) of  **$\text{Mo}_8\text{S}_8(\text{Ale})_4$** .

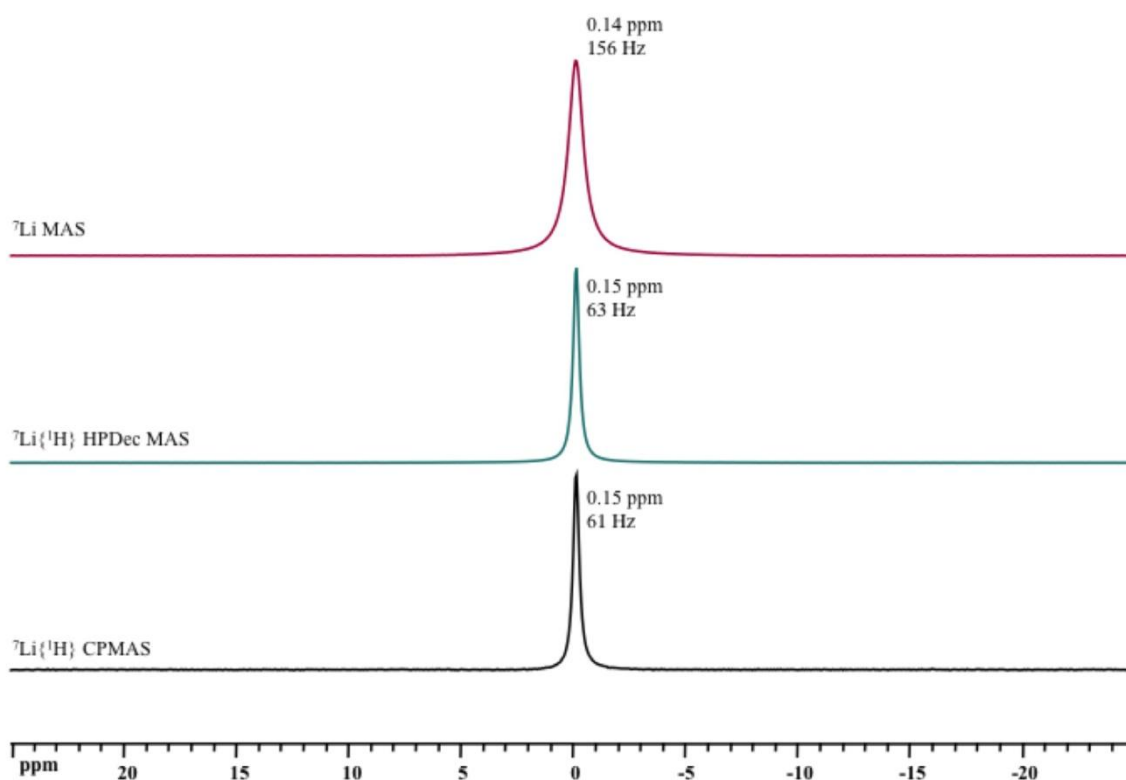

**Figure SI8:**  $^7\text{Li}$  MAS NMR spectra of  $\text{Mo}_8\text{O}_8(\text{Ale})_4$  acquired (top) without CP and heteronuclear decoupling, (medium) without CP but under heteronuclear TPPM decoupling, and (bottom) with CP and heteronuclear TPPM decoupling.

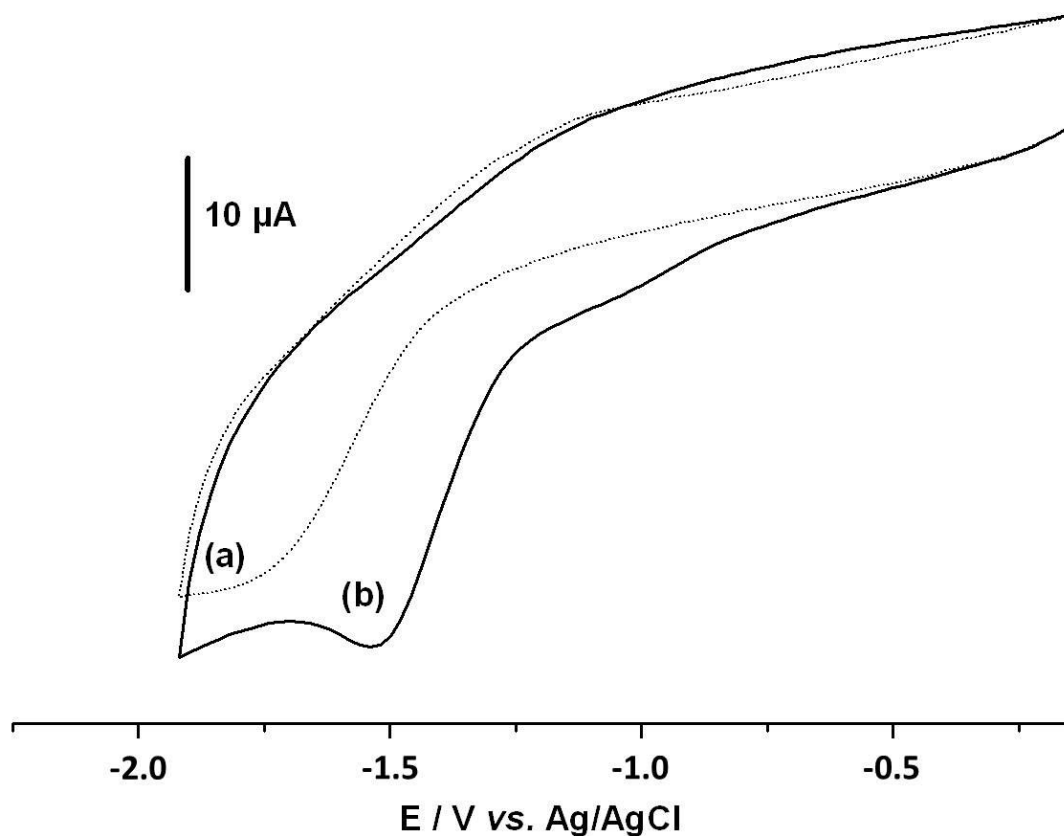

**Figure SI9:** Cyclic voltammograms of  $Mo_8S_8(Ale)_4$  deposited onto a glassy carbon electrode (b) compared to the bare glassy carbon electrode (a) in  $CH_3CN + 0.1 M$  tetrahexylammonium perchlorate as electrolyte in the presence of trifluoroacetic acid  $53 \mu M$ . Scan rate  $0.1 V s^{-1}$ ; potentials are given vs  $AgCl/Ag$  electrode.
